# Supplementary material for: Effects of oral morphine on experimentally evoked itch and pain: a randomized, double-blind, placebo-controlled trial
Source: publisher site journal article supplement (doi:10.1515/sjpain-2023-0034), 2023-09-14
Supplement: Supplementary file 1 [file j_sjpain-2023-0034_suppl_001.docx]

*AppendixS2 Intervention, randomization, blinding and sample size*

Each participant received either two tablets of 10 mg morphine (morphine hydrochloride; Takeda Pharma, Łyszkowice, Poland) or identical placebo (lactose monohydrate; “Region Hovedstadens Apotek,” Copenhagen, Denmark) in random order with 150 mL water. The randomization sequence was computer-generated using the randomization tool “sealedenvelope.com” by a third person not directly involved in the study. Randomization was stratified by sex into blocks of 6. The investigator (HO) performed the experimental investigations. Before each session, another staff member, not otherwise associated with the study, assigned and prepared the study medications according to the randomization envelopes. Both morphine and placebo were administered in an identical tablet form by a third person. Therefore, both the participants and the investigator (HO) were blinded to treatment allocation until data analysis (Fig. 1). Sample size was calculated using G*power 3.1.9.2. The study design enabled within- and between-group parametric and non-parametric (based on the data distribution; Shapiro–Wilk test for normality) statistics. We conservatively estimated the change in the primary outcome to be small to moderate (Cohen’s f = 0.23). The sample size was calculated based on a two-way mixed analysis of variance (ANOVA) with between-group factor (morphine versus placebo) and within-group factor (5 time points); types I and II errors were set to 5% and 20%, respectively. Twenty-four participants were required to reveal a difference between the two groups across time.
