# Supplementary material for: Effects of oral morphine on experimentally evoked itch and pain: a randomized, double-blind, placebo-controlled trial
Source: publisher site journal article supplement (doi:10.1515/sjpain-2023-0034), 2023-09-14
Supplement: Supplementary file 2 [file j_sjpain-2023-0034_suppl_002.docx]

Figure S1. Temporal profiles of itch and pain intensity. Itch intensity in the morphine and placebo groups following histamine and cowhage administration in the forearm and mandibular areas (A–D), and pain intensity following each itch provocation in the forearm and mandibular areas (E–H). Histamine and cowhage showed similar patterns in the forearm and mandibular areas of the morphine and placebo groups.
