# Supplementary material for: Effects of oral morphine on experimentally evoked itch and pain: a randomized, double-blind, placebo-controlled trial
Source: publisher site journal article supplement (doi:10.1515/sjpain-2023-0034), 2023-09-14
Supplement: Supplementary file 3 [file j_sjpain-2023-0034_suppl_003.docx]

*AppendixS1 Quantitative sensory testing and neurogenic vasodilation*

CPT and HPT were performed using a TSA II Neurosensory Analyzer (Medoc Ltd, Israel). A thermal stimulator probe (3 × 3 cm) was applied 5 cm distal to the elbow on the right dorsal forearm. Starting at 32 °C, the temperature was decreased or increased at a rate of 1°C/s. Participants were asked to press a button when the evoked sensation was perceived as painful. The pressure was applied to the supinator muscle on the left forearm, 15 cm distal to the elbow, using a handheld electronic pressure algometer (Somedic AB; Stockholm, Sweden) with a standard 1 cm2 probe. The pressure was increased at a rate of 30 kPa/s, with a functional maximum pressure of 2,000 kPa, until the pain threshold was reached, and the intensity (kPa) was recorded. These measurements were repeated three times, and the average stimulus intensity (temperature [°C], intensity [kPa]) was calculated for further analysis. The reliability of these methods in assessing the analgesic effect of opioids administered to humans has been previously verified [19, 20]. he neurogenic flare, quantified by superficial blood perfusion, was measured using FLPI (Moor FLPI-2; Moor Instruments, Axminster, Devon, UK). The device was placed 25 cm from the skin surface (exposure time:8.3 ms). Images were obtained at baseline (before tablet administration) and before and 10 min after itch provocation. Images were analyzed using proprietary software (Moor FLPI Review Version 4.0; Moor Instruments, Axminster, Devon, UK) using two methods: (1) a region of interest (ROI) approach with an ROI equivalent to the predefined 4 × 4 cm area giving rise to an arithmetic mean and peak perfusion (cutaneous flare), and (2) a flare-size approach in which the area associated with itch provocation and ≥ 50% increase compared with surrounding background perfusion was quantified in square centimeter using the 4 × 4 cm area as a reference (flare area). These quantification methods were previously described by Olsen et al. [21].
